# Supplementary material for: Addressing Irrigation Mismanagement in Uzbekistan’s Oltinsoy District: A Pathway to Sustainable Water Management
Source: Preprints.org preprint supplement (doi:10.20944/preprints202306.1577.v1), 2023-06-21
Supplement: Supplementary file 1 [file supplementary]

**Highlights**

- Addressing irrigation mismanagement in Uzbekistan's Oltinsoy District to achieve sustainable water management.
- Proposed effective measures to alleviate water scarcity in the region through well-executed projects and maintenance.
- Focuses on the urgent need for long-term sustainability at the local level.
- Emphasizes the role of irrigation mismanagement in exacerbating water scarcity in Uzbekistan.
- Does not analyze the impact of global warming on the decline of water resources in Uzbekistan.
